# Supplementary material
Source: MDPI journal article supplement (https://www.mdpi.com/2075-163X/13/6/774)
Supplement: s1 [file s1]

Table S1. Trace element composition of magnetite from the Takab iron ore samples.

|       | Mg  | Al   | Si   | Ca   | Ti   | V   | Mn   | Ni | Cr | Cu |
|-------|-----|------|------|------|------|-----|------|----|----|----|
| TAK21 | 145 | 1141 | 91   | 6    | 575  | 9   | 893  | 17 | 37 | 0  |
|       | 208 | 1300 | 11   | 21   | 755  | 28  | 1000 | 0  | 0  | 21 |
|       | 208 | 1669 | 17   | 4    | 721  | 9   | 998  | 0  | 24 | 16 |
|       | 147 | 895  | 11   | 6    | 612  | 34  | 948  | 0  | 22 | 31 |
|       | 251 | 1132 | 13   | 4    | 752  | 31  | 1059 | 9  | 31 | 12 |
|       | 197 | 878  | 9    | 1    | 726  | 6   | 1037 | 0  | 19 | 39 |
|       | 119 | 1419 | 14   | 18   | 817  | 13  | 907  | 0  | 14 | 0  |
|       | 273 | 1587 | 218  | 72   | 1022 | 43  | 1000 | 0  | 46 | 7  |
|       | 156 | 1073 | 107  | 24   | 628  | 54  | 903  | 0  | 18 | 0  |
|       | 134 | 1986 | 215  | 16   | 580  | 38  | 990  | 11 | 25 | 10 |
|       | 132 | 1755 | 71   | 25   | 586  | 17  | 878  | 1  | 16 | 24 |
|       | 160 | 1842 | 55   | 21   | 964  | 8   | 926  | 0  | 29 | 49 |
| TAK51 | 81  | 431  | 112  | 16   | 13   | 93  | 2779 | 8  | 34 | 0  |
|       | 46  | 348  | 634  | 15   | 19   | 61  | 2681 | 0  | 22 | 10 |
|       | 93  | 392  | 196  | 24   | 14   | 85  | 2630 | 70 | 98 | 40 |
|       | 57  | 386  | 89   | 10   | 22   | 87  | 2572 | 5  | 0  | 0  |
|       | 98  | 428  | 0    | 18   | 17   | 78  | 2594 | 15 | 22 | 0  |
|       | 100 | 397  | 0    | 21   | 28   | 79  | 2363 | 0  | 8  | 0  |
|       | 98  | 388  | 0    | 7    | 10   | 78  | 2556 | 0  | 26 | 18 |
|       | 66  | 338  | 1071 | 19   | 26   | 86  | 2238 | 14 | 39 | 0  |
|       | 52  | 227  | 162  | 39   | 15   | 58  | 2337 | 0  | 23 | 0  |
|       | 61  | 243  | 541  | 27   | 20   | 74  | 2282 | 8  | 15 | 0  |
|       | 89  | 367  | 125  | 10   | 14   | 62  | 2240 | 0  | 17 | 0  |
|       | 73  | 292  | 127  | 13   | 18   | 79  | 2302 | 4  | 11 | 2  |
| TAK52 | 96  | 1588 | 11.8 | 12   | 161  | 84  | 2123 | 10 | 38 | 9  |
|       | 120 | 1822 | 13.1 | 1    | 201  | 97  | 2020 | 9  | 24 | 2  |
|       | 143 | 1922 | 15.8 | 3    | 171  | 105 | 2108 | 30 | 19 | 37 |
|       | 101 | 1576 | 12.9 | 2    | 160  | 95  | 1972 | 4  | 35 | 26 |
|       | 134 | 2022 | 14.7 | 8    | 162  | 116 | 2101 | 2  | 42 | 12 |
|       | 95  | 1402 | 56   | 11   | 166  | 95  | 1908 | 3  | 43 | 3  |
|       | 96  | 1457 | 67   | 15   | 148  | 117 | 2035 | 14 | 19 | 20 |
|       | 115 | 2120 | 11.8 | 9    | 209  | 105 | 2177 | 17 | 26 | 31 |
|       | 117 | 1977 | 92   | 4    | 192  | 108 | 2183 | 4  | 34 | 15 |
|       | 142 | 2440 | 98   | 8    | 231  | 82  | 2138 | 2  | 30 | 30 |
|       | 143 | 2461 | 0    | 0    | 225  | 98  | 2217 | 21 | 15 | 14 |
|       | 147 | 2473 | 39.7 | 71   | 218  | 108 | 1871 | 2  | 31 | 10 |
|       | 101 | 2148 | 17   | 42   | 228  | 107 | 2236 | 21 | 45 | 0  |
|       | 200 | 2067 | 5    | 22   | 243  | 97  | 1715 | 5  | 20 | 0  |
|       | 291 | 2459 | 99   | 4    | 176  | 91  | 1545 | 0  | 42 | 7  |
|       | 240 | 1917 | 98   | 1    | 198  | 117 | 1357 | 4  | 19 | 20 |
|       | 266 | 2143 | 29   | 44   | 170  | 85  | 1327 | 26 | 53 | 6  |
|       | 260 | 2473 | 78   | 5    | 230  | 93  | 1293 | 23 | 20 | 13 |
|       | 272 | 1767 | 11.4 | 9    | 154  | 106 | 1302 | 8  | 19 | 8  |
|       | 125 | 2626 | 16.4 | 64.4 | 135  | 117 | 1499 | 11 | 31 | 23 |
|       | 123 | 2588 | 14.3 | 62.3 | 173  | 71  | 1473 | 30 | 20 | 40 |

|       |     |      |      |    |      |     |       |    |    |    |
|-------|-----|------|------|----|------|-----|-------|----|----|----|
| TAK24 | 190 | 349  | 0    | 1  | 28   | 62  | 8680  | 0  | 8  | 0  |
|       | 163 | 355  | 0    | 13 | 15   | 68  | 9056  | 1  | 17 | 6  |
|       | 170 | 352  | 0    | 0  | 28   | 69  | 8638  | 0  | 2  | 18 |
|       | 134 | 342  | 0    | 3  | 34   | 78  | 8218  | 0  | 3  | 15 |
|       | 118 | 345  | 0    | 8  | 33   | 65  | 7809  | 6  | 4  | 2  |
|       | 264 | 386  | 26.7 | 0  | 15   | 66  | 10609 | 0  | 9  | 0  |
|       | 222 | 378  | 24.4 | 1  | 36   | 66  | 10190 | 7  | 0  | 0  |
|       | 226 | 372  | 0    | 3  | 34   | 80  | 9750  | 26 | 13 | 8  |
|       | 169 | 363  | 0    | 4  | 43   | 77  | 8671  | 8  | 16 | 0  |
|       | 252 | 380  | 0    | 1  | 23   | 88  | 10356 | 0  | 20 | 0  |
|       | 220 | 372  | 0    | 0  | 22   | 70  | 9967  | 16 | 12 | 0  |
|       | 236 | 358  | 0    | 5  | 37   | 73  | 10340 | 33 | 4  | 22 |
|       | 251 | 371  | 0    | 3  | 39   | 74  | 10212 | 20 | 7  | 0  |
| TAK53 | 138 | 2254 | 0    | 12 | 1940 | 180 | 3360  | 13 | 0  | 27 |
|       | 109 | 2070 | 39   | 15 | 1699 | 180 | 3358  | 18 | 8  | 19 |
|       | 88  | 1962 | 198  | 10 | 1602 | 200 | 2979  | 37 | 0  | 26 |
|       | 106 | 1966 | 168  | 18 | 1433 | 181 | 2927  | 13 | 7  | 0  |
|       | 53  | 1011 | 82   | 24 | 945  | 165 | 2317  | 10 | 17 | 7  |
|       | 75  | 1452 | 183  | 23 | 1444 | 140 | 2487  | 4  | 20 | 7  |
|       | 84  | 1651 | 0    | 20 | 1077 | 152 | 2369  | 13 | 8  | 25 |
|       | 73  | 1720 | 0    | 15 | 1334 | 118 | 2204  | 23 | 11 | 18 |
|       | 46  | 1273 | 290  | 6  | 1303 | 195 | 1923  | 4  | 19 | 0  |

The average values of the element whose minimum concentrations are below detection limit in some analyses were calculated by assigning all these values to zero."nc" : The average value of the element was not calculated when only a few analyses show concentration above the detection limit for this element

**Table S2.** Iron and oxygen isotope data for magnetite from Takab.

| Samples | Grains | $\delta^{18}\text{O}$ (‰) | $2\sigma$ | $\delta^{56}\text{Fe}$ (‰) | $2\sigma$ |
|---------|--------|---------------------------|-----------|----------------------------|-----------|
| TAK51   | gr4-1  |                           |           | 0.46                       | 0.23      |
|         | gr4-2  | -0.13                     | 0.22      | 0.59                       | 0.18      |
|         | gr4-3  | -2.52                     | 0.38      | 0.35                       | 0.20      |
|         | gr4B-1 | 1.06                      | 0.25      | 0.03                       | 0.22      |
|         | gr4C-1 | -1.28                     | 0.23      | 0.24                       | 0.27      |
|         | gr4D-1 | -0.66                     | 0.23      | 0.48                       | 0.19      |
|         | gr5-1  | -1.11                     | 0.22      | -0.18                      | 0.22      |
|         | gr5-2  | 0.15                      | 0.21      | 0.43                       | 0.20      |
|         | gr5-3  |                           |           | -0.22                      | 0.20      |
|         | gr5-4  |                           |           | 0.34                       | 0.18      |
|         | grX-1  | 1.10                      | 0.21      | 1.12                       | 0.21      |
|         | grX-2  | 0.55                      | 0.20      | 0.75                       | 0.19      |
|         | grX-3  | 0.45                      | 0.21      | 0.92                       | 0.20      |
| TAK52   | gr6-1  | 0.21                      | 0.21      | 0.28                       | 0.20      |
|         | gr6-2  | -0.73                     | 0.24      | 0.13                       | 0.20      |
|         | gr6-3  | -0.26                     | 0.22      | -0.28                      | 0.20      |
|         | gr6-4  | 0.04                      | 0.22      | 0.13                       | 0.22      |
|         | gr7-1  | 1.95                      | 0.23      | 0.66                       | 0.22      |
|         | gr7A-1 | -1.52                     | 0.23      | -0.10                      | 0.19      |
|         | gr7A-2 | -1.12                     | 0.23      | 0.28                       | 0.21      |
|         | gr7A-3 | -1.24                     | 0.25      | 0.40                       | 0.19      |
|         | gr7B-1 |                           |           | 0.30                       | 0.28      |
|         | gr7B-2 | 1.22                      | 0.21      | 0.28                       | 0.21      |
|         | gr8-1  | 0.73                      | 0.22      | 0.85                       | 0.21      |
|         | gr8-2  | 1.13                      | 0.22      | 0.76                       | 0.21      |
|         | gr8-3  |                           |           | 0.75                       | 0.20      |
|         | gr8-4  | 0.57                      | 0.23      | 0.92                       | 0.19      |
|         | gr8-5  | 1.19                      | 0.21      | 0.86                       | 0.21      |
| TAK24   | gr1-1  | 4.10                      | 0.22      | -0.62                      | 0.20      |
|         | gr1-2  | 4.55                      | 0.20      | -0.52                      | 0.20      |
|         | gr1-3  | 4.84                      | 0.22      | -0.69                      | 0.21      |
|         | gr1-4  | 6.30                      | 0.23      | -0.46                      | 0.19      |
|         | gr2-1  | 5.26                      | 0.23      | -0.38                      | 0.21      |
|         | gr2-2  | 5.46                      | 0.24      | -0.64                      | 0.19      |
|         | gr2-3  | 5.75                      | 0.23      | -0.38                      | 0.19      |
|         | gr2-4  | 5.01                      | 0.23      | 0.07                       | 0.20      |
|         | gr2-5  | 5.57                      | 0.23      |                            |           |
|         | gr3-1  | 4.49                      | 0.21      | 0.09                       | 0.20      |
|         | gr3-2  | 5.78                      | 0.22      | -0.24                      | 0.19      |
|         | gr3-3  | 4.74                      | 0.23      | -0.18                      | 0.20      |
|         | gr3-4  | 5.18                      | 0.23      | 0.42                       | 0.19      |
|         | gr3-5  | 5.35                      | 0.23      | 0.56                       | 0.19      |
|         | gr3-6  | 5.19                      | 0.21      | 0.11                       | 0.21      |
|         | gr3-7  | 5.95                      | 0.26      | -0.21                      | 0.22      |
|         | gr3-8  | 5.56                      | 0.22      | -0.07                      | 0.19      |
|         | gr3-9  | 5.10                      | 0.22      | -0.11                      | 0.20      |
|         | gr4-1  | 6.20                      | 0.22      | -0.62                      | 0.18      |
|         | gr4-2  | 6.02                      | 0.21      | -0.90                      | 0.21      |
|         | gr4-3  | 4.79                      | 0.20      | -0.53                      | 0.17      |
|         | gr4-4  | 5.09                      | 0.22      | -0.98                      | 0.22      |
|         | gr4-5  | 5.61                      | 0.21      | -0.83                      | 0.19      |

|       |        |      |      |      |      |
|-------|--------|------|------|------|------|
| TAK53 | gr13-1 | 1.02 | 0.24 | 0.76 | 0.26 |
|       | gr13-2 | 1.59 | 0.22 | 1.20 | 0.23 |
|       | gr13-3 | 1.66 | 0.23 | 1.15 | 0.20 |
|       | gr8-1  |      |      | 1.64 | 0.18 |
|       | gr8-2  |      |      | 1.49 | 0.21 |
|       | gr8B-1 | 1.11 | 0.23 | 0.97 | 0.21 |
|       | gr8B-2 | 1.72 | 0.22 | 1.32 | 0.21 |
|       | gr5-1  | 2.51 | 0.23 | 1.40 | 0.19 |
|       | gr5-2  | 2.51 | 0.23 | 1.59 | 0.20 |
|       | gr5-3  | 2.33 | 0.22 |      |      |
|       | gr6-1  | 3.20 | 0.24 | 1.75 | 0.18 |
|       | gr6-2  | 4.07 | 0.22 | 1.86 | 0.22 |
|       | gr6-3  | 2.38 | 0.23 | 1.55 | 0.19 |
|       | gr4B-1 |      |      | 1.10 | 0.18 |
|       | gr4B-2 | 1.75 | 0.26 | 1.08 | 0.23 |
